# Supplementary material for: Chronic airflow obstruction and ambient particulate air pollution
Source: PubMed Central journal article supplement (PMC8606424; doi:10.1136/thoraxjnl-2020-216223), 2021-05-11
Supplement: thoraxjnl-2020-216223supp001.pdf [file thoraxjnl-2020-216223supp001.pdf]

1 [Online supplement](#)

2 **Chronic airflow obstruction and ambient particulate air pollution**

3

4 André F.S. Amaral<sup>1\*</sup>, Peter Burney<sup>1\*</sup>, Jaymini Patel<sup>1</sup>, Cosetta Minelli<sup>1</sup>, Filip Mejza<sup>2</sup>, David Mannino<sup>3</sup>,  
5 Terence Seemungal<sup>4</sup>, Mahesh PA<sup>5</sup>, Li Cher Loh<sup>6</sup>, Christer Janson<sup>7</sup>, Sanjay Juvekar<sup>8</sup>, Meriam  
6 Denguezli<sup>9</sup>, Imed Harrabi<sup>10</sup>, Emiel F.M. Wouters<sup>11</sup>, Hamid Chersaki<sup>12</sup>, Kevin Mortimer<sup>13</sup>, Rain Jögi<sup>14</sup>,  
7 Eric Bateman<sup>15</sup>, Elaine Fuertes<sup>1</sup>, Mohamed Al Ghobain<sup>16</sup>, Wan Tan<sup>17</sup>, Daniel Obaseki<sup>18</sup>, Asma El  
8 Sony<sup>19</sup>, Michael Studnicka<sup>20</sup>, Althea Aquart-Stewart<sup>21</sup>, Parvaiz Koul<sup>22</sup>, Hervé Lawin<sup>23</sup>, Asaad Ahmed  
9 Nafees<sup>24</sup>, Olayemi Awopeju<sup>18</sup>, Gregory Erhabor<sup>18</sup>, Thorarinn Gislason<sup>25,26</sup>, Tobias Welte<sup>27</sup>, Amund  
10 Gulsvik<sup>28</sup>, Rune Nielsen<sup>28,29</sup>, Louisa Gnatiuc<sup>30</sup>, Ali Koçabas<sup>31</sup>, Guy Marks<sup>32,33</sup>, Talant Sooronbaev<sup>34</sup>,  
11 Bertrand Hugo Mbatchou Ngahane<sup>35</sup>, Cristina Bárbara<sup>36</sup>, A Sonia Buist<sup>37</sup>

12 \*Co-first authors

13

14 1 National Heart and Lung Institute, Imperial College London, London, UK

15 2 Centre for Evidence Based Medicine, 2nd Department of Internal Medicine, Jagiellonian University

16 Medical College, Kraków, Poland

17 3 University of Kentucky, Lexington, KY, USA

18 4 Faculty of Medical Sciences, University of West Indies, St Augustine, Trinidad and Tobago

19 5 Department of Respiratory Medicine, JSS Medical College, Mysore, India

20 6 Department of Medicine, RCSI & UCD Malaysia Campus, Penang, Malaysia

21 7 Department of Medical Sciences: Respiratory, Allergy and Sleep Research, Uppsala University,

22 Uppsala, Sweden

23 8 Vadu Rural Health Program (VRHP), KEM Hospital Research Centre, Pune, India

24 9 Laboratoire de Physiologie et des Explorations Fonctionnelles, Faculté de Médecine de Sousse,

25 Université de Sousse, Sousse, Tunisia

26 10 Faculté de Médecine, Université de Sousse, Sousse, Tunisia

- 27 11 Maastricht University Medical Center, Maastricht, The Netherlands
- 28 12 Faculté de Médecine de Annaba, Service de Epidémiologie et Médecine Préventive, El Hadjar,
- 29 Algeria
- 30 13 Liverpool School of Tropical Medicine, Liverpool, UK
- 31 14 Lung Clinic, Tartu University Hospital, Tartu, Estonia
- 32 15 University of Cape Town Lung Institute, Cape Town, South Africa
- 33 16 Department of Medicine, King Saud bin Abdulaziz University for Health Sciences & King Abdullah
- 34 International Medical Research Centre, Riyadh, Saudi Arabia
- 35 17 Centre for Heart Lung Innovation, University of British Columbia, Vancouver, BC, Canada
- 36 18 Obafemi Awolowo University, Ile-Ife, Nigeria
- 37 19 The Epidemiological Laboratory, Khartoum, Sudan
- 38 20 Department of Pneumology, Paracelsus Medical University, Salzburg, Austria
- 39 21 University of the West Indies, Kingston, Jamaica
- 40 22 Sher-i-Kashmir Institute of Medical Sciences, Srinagar, J&K, India
- 41 23 Occupational and Environmental Health, University of Abomey Calavi, Cotonou, Benin
- 42 24 Department of Community Health Sciences, Aga Khan University, Karachi, Pakistan
- 43 25 Department of Sleep, Landspítali - The National University Hospital of Iceland, Reykjavik, Iceland
- 44 26 University of Iceland, Faculty of Medicine, Reykjavik, Iceland
- 45 27 Hannover Medical School, Hannover, Germany
- 46 28 Department of Thoracic Medicine, Haukeland University Hospital, Bergen, Norway
- 47 29 Department of Clinical Science, University of Bergen, Bergen, Norway
- 48 30 Nuffield Department of Population Health, Oxford University, Oxford, UK
- 49 31 Department of Chest Disease. Cukurova University School of Medicine. Adana, Turkey
- 50 32 Woolcock Institute of Medical Research, Sydney, NSW, Australia
- 51 33 South Western Sydney Clinical School, University of New South Wales, Sydney, Australia

52 34 Department of Respiratory Medicine, National Center for Cardiology and Internal Medicine,

53 Bishkek, Kyrgyzstan

54 35 Douala General Hospital, Douala, Cameroon

55 36 Institute of Environmental Health, Lisbon Medical School, Lisbon University, Lisbon, Portugal

56 37 Oregon Health & Science University, Portland, OR, USA

57

58 **Corresponding author:**

59 Andre F.S. Amaral

60 National Heart and Lung Institute, Imperial College London

61 London SW3 6LR, UK

62 [a.amaral@imperial.ac.uk](mailto:a.amaral@imperial.ac.uk)

63

64

65 **Table of content**

66 **BOLD study details** ----- page 4

67 **PM<sub>2.5</sub> concentrations** ----- page 4

68 **Statistical analysis** ----- page 5

69 **References** ----- page 5

70 **Table S1** ----- page 7

71 **Table S2** ----- page 8

72 **Table S3** ----- page 8

73 **Table S4** ----- page 8

74 **BOLD study details**

75 The BOLD study has been described in detail elsewhere<sup>1</sup>. Briefly, representative samples of the  
76 general population over the age of 40 were drawn from a sample of sites taken from around the  
77 world. These were drawn so as to represent most of the regions defined by the Global Burden of  
78 Disease (the exceptions were Latin America which had a separate study, the high-income countries  
79 of Asia, and Oceania) with a bias towards larger regions such as South Asia. All sites received  
80 approval from their local ethics committee, and participants provided informed consent. Spirometry  
81 was conducted before and after a bronchodilator (200 µg Salbutamol inhaled via a spacer) using a  
82 forced manoeuvre and an EasyOne spirometer (ndd Medizintechnik AG, Zurich, Switzerland). All  
83 spirometry data were reviewed for quality control during the study in either Salt Lake City or  
84 London. CAO was defined as a post-bronchodilator ratio of the forced expiratory volume in the first  
85 second (FEV<sub>1</sub>) to the forced vital capacity (FVC), less than the lower limit of normal, which was  
86 determined using the equations for white Americans in the NHANES III study<sup>2</sup>. Information from  
87 participants on several risk factors, including whether they had ever smoked, was collected using a  
88 standardised questionnaire.

89

90 **PM<sub>2.5</sub> concentrations**

91 The concentrations of annual mean PM<sub>2.5</sub> were downloaded from a freely available resource on the  
92 Atmospheric Composition Analysis Group website.<sup>3</sup> Briefly, global ground-level PM<sub>2.5</sub> concentrations  
93 were estimated by combining aerosol optical depth data from satellites with simulation-based data  
94 from a chemical transport model. These were then calibrated to ground-based observations of PM<sub>2.5</sub>  
95 using a geographically weighted regression, which allows the estimation of local levels.<sup>4</sup> We used  
96 data at a spatial resolution of 0.01° latitude by 0.01° longitude.

97

98

99

100 **Statistical analysis**

101 The unit of our ecological analysis was the site, and the analysis was performed separately for males  
102 and females. The counts of the male and female cases of CAO in each site were regressed separately  
103 in negative binomial models, with the local sample size as an offset. The analyses included the  
104 prevalence of male, or female, smoking in the site as measured from the BOLD sample, the GNI and  
105 the level of PM<sub>2.5</sub> (all composition) for the site. Both GNI and PM<sub>2.5</sub> were log transformed as there is  
106 evidence in each case of a non-linear relationship with chronic lung disease<sup>5,6</sup>. We conducted a series  
107 of sensitivity analyses in which we re-run the main analysis: 1) using PM<sub>2.5</sub> (all composition)  
108 estimates for a 10-km radius buffer; and 2) using dust and sea-salt removed PM<sub>2.5</sub> instead of all  
109 composition PM<sub>2.5</sub>.

110

111 **References**

- 112 1. Buist AS, Vollmer WM, Sullivan SD, et al. The Burden of Obstructive Lung Disease Initiative  
113 (BOLD): rationale and design. *Copd* 2005; **2**(2): 277-83.
- 114 2. Hankinson JL, Odencrantz JR, Fedan KB. Spirometric reference values from a sample of the  
115 general U.S. population. *American journal of respiratory and critical care medicine* 1999; **159**(1): 179-  
116 87.
- 117 3. Atmospheric Composition Analysis Group. Surface PM2.5.  
118 [http://fizz.phys.dal.ca/~atmos/martin/?page\\_id=140](http://fizz.phys.dal.ca/~atmos/martin/?page_id=140) (accessed 18 February 2020).
- 119 4. van Donkelaar A, Martin RV, Brauer M, et al. Global Estimates of Fine Particulate Matter  
120 using a Combined Geophysical-Statistical Method with Information from Satellites, Models, and  
121 Monitors. *Environ Sci Technol* 2016; **50**(7): 3762-72.
- 122 5. Burney P, Jithoo A, Kato B, et al. Chronic obstructive pulmonary disease mortality and  
123 prevalence: the associations with smoking and poverty--a BOLD analysis. *Thorax* 2014; **69**(5): 465-73.

- 124 6. Burnett RT, Pope CA, Ezzati M, et al. An integrated risk function for estimating the global  
125 burden of disease attributable to ambient fine particulate matter exposure. *Environmental health*  
126 *perspectives* 2014; **122**(4): 397-403.  
127

128 **Table S1.** Sample size and prevalence of chronic airflow obstruction (CAO) in the population and in  
 129 never smokers by site and sex.

| Site                             | Males |       |                        | Females |       |                        |
|----------------------------------|-------|-------|------------------------|---------|-------|------------------------|
|                                  | N     | CAO % | CAO % in never smokers | N       | CAO % | CAO % in never smokers |
| Albania (Tirana)                 | 467   | 12.8  | 2.3                    | 472     | 4.2   | 3.8                    |
| Algeria (Annaba)                 | 442   | 9.3   | 3.8                    | 448     | 4.5   | 4.5                    |
| Australia (Sydney)               | 265   | 7.9   | 4.8                    | 276     | 13.8  | 9.0                    |
| Austria (Salzburg)               | 685   | 12.8  | 7.8                    | 573     | 19.4  | 12.9                   |
| Benin (Sèmè-Kpodji)              | 302   | 6.6   | 6.6                    | 396     | 8.1   | 8.1                    |
| Cameroon (Limbe)                 | 206   | 6.3   | 4.5                    | 138     | 4.3   | 4.5                    |
| Canada (Vancouver)               | 344   | 12.8  | 6.8                    | 483     | 12.0  | 7.1                    |
| China (Guangzhou)                | 236   | 9.9   | 2.3                    | 237     | 6.3   | 4.5                    |
| England (London)                 | 323   | 16.1  | 6.6                    | 354     | 15.8  | 7.9                    |
| Estonia (Tartu)                  | 309   | 8.7   | 1.8                    | 305     | 5.2   | 5.3                    |
| Germany (Hannover)               | 349   | 10.0  | 3.2                    | 334     | 7.8   | 5.4                    |
| Iceland (Reykjavik)              | 403   | 8.9   | 5.1                    | 354     | 13.3  | 8.8                    |
| India (Kashmir)                  | 416   | 17.3  | 4.1                    | 344     | 15.4  | 13.5                   |
| India (Mumbai)                   | 275   | 6.2   | 2.6                    | 165     | 7.9   | 7.9                    |
| India (Mysore)                   | 258   | 11.2  | 9.0                    | 348     | 5.5   | 5.2                    |
| India (Pune)                     | 502   | 5.8   | 5.0                    | 343     | 6.7   | 6.7                    |
| Jamaica                          | 243   | 10.3  | 3.4                    | 335     | 7.5   | 6.6                    |
| Kyrgyzstan (Chui)                | 280   | 13.9  | 9.7                    | 611     | 7.9   | 7.1                    |
| Kyrgyzstan (Naryn)               | 328   | 11.0  | 8.5                    | 531     | 4.7   | 4.4                    |
| Malawi (Blantyre)                | 160   | 6.9   | 4.5                    | 242     | 9.1   | 9.3                    |
| Malawi (Chikwawa)                | 222   | 18.0  | 12.3                   | 212     | 9.4   | 8.0                    |
| Malaysia (Penang)                | 340   | 4.4   | 2.3                    | 323     | 3.4   | 3.4                    |
| Morocco (Fes)                    | 354   | 11.9  | 8.3                    | 414     | 7.5   | 7.6                    |
| Netherlands (Maastricht)         | 300   | 19.0  | 3.8                    | 290     | 17.2  | 10.4                   |
| Nigeria (Ile-Ife)                | 346   | 7.5   | 7.2                    | 538     | 6.7   | 6.4                    |
| Norway (Bergen)                  | 324   | 14.8  | 9.6                    | 334     | 10.2  | 5.0                    |
| Pakistan (Karachi)               | 268   | 14.6  | 10.0                   | 339     | 6.5   | 6.7                    |
| Philippines (Manila)             | 378   | 13.0  | 6.6                    | 515     | 5.2   | 4.5                    |
| Philippines (Nampicuan-Talugtug) | 356   | 16.3  | 8.5                    | 366     | 12.3  | 9.4                    |
| Poland (Krakow)                  | 266   | 15.0  | 3.6                    | 260     | 12.3  | 13.7                   |
| Portugal (Lisbon)                | 331   | 13.9  | 9.4                    | 380     | 9.5   | 8.1                    |
| Saudi Arabia (Riyadh)            | 375   | 3.5   | 2.6                    | 325     | 2.8   | 2.8                    |
| South Africa (Uitsig-Ravensmead) | 315   | 23.8  | 2.0                    | 532     | 16.2  | 6.7                    |
| Sri Lanka                        | 460   | 11.7  | 8.1                    | 568     | 3.9   | 3.9                    |
| Sudan (Gezeira)                  | 301   | 5.6   | 5.1                    | 283     | 6.0   | 6.1                    |
| Sudan (Khartoum)                 | 307   | 10.4  | 9.5                    | 210     | 10.0  | 10.3                   |
| Sweden (Uppsala)                 | 283   | 10.2  | 5.6                    | 264     | 8.3   | 6.4                    |
| Trinidad & Tobago                | 437   | 6.6   | 4.2                    | 660     | 6.7   | 6.4                    |
| Tunisia (Sousse)                 | 309   | 8.4   | 8.1                    | 352     | 2.0   | 1.6                    |
| Turkey (Adana)                   | 389   | 19.8  | 6.8                    | 417     | 9.1   | 8.3                    |
| USA (Lexington, KY)              | 206   | 13.6  | 2.3                    | 302     | 16.2  | 5.8                    |

130 N, sample size.

131

132 **Table S2.** Sensitivity analysis – as for table 3, with estimates of PM<sub>2.5</sub> for a 10-km radius buffer.

| Variable                | Males      |           |          | Females    |           |          |
|-------------------------|------------|-----------|----------|------------|-----------|----------|
|                         | Rate ratio | 95%CI     | <i>P</i> | Rate ratio | 95%CI     | <i>P</i> |
| Smoking                 | 4.17       | 2.39-7.29 | < 0.001  | 11.1       | 5.66-21.8 | < 0.001  |
| Log(GNI)                | 0.90       | 0.81-0.99 | 0.048    | 0.83       | 0.73-0.94 | 0.003    |
| Log(PM <sub>2.5</sub> ) | 0.93       | 0.79-1.09 | 0.37     | 1.05       | 0.89-1.25 | 0.55     |

133 GNI, gross national income per capita; PM<sub>2.5</sub>, particulate matter <2.5µm aerodynamic diameter.

134

135

136 **Table S3.** Sensitivity analysis – as for table 3, with estimates of PM<sub>2.5</sub> with dust and sea-salt removed.

| Variable                | Males      |           |          | Females    |           |          |
|-------------------------|------------|-----------|----------|------------|-----------|----------|
|                         | Rate ratio | 95%CI     | <i>P</i> | Rate ratio | 95%CI     | <i>P</i> |
| Smoking                 | 4.38       | 2.51-7.62 | < 0.001  | 10.4       | 5.52-19.6 | < 0.001  |
| Log(GNI)                | 0.92       | 0.83-1.02 | 0.1      | 0.83       | 0.73-0.94 | 0.003    |
| Log(PM <sub>2.5</sub> ) | 1.04       | 0.92-1.18 | 0.48     | 1.03       | 0.92-1.16 | 0.59     |

137 GNI, gross national income per capita; PM<sub>2.5</sub>, particulate matter <2.5µm aerodynamic diameter.

138

139

140 **Table S4.** Sensitivity analysis – as for table 3, with estimates of PM<sub>2.5</sub> with dust and sea-salt removed for a 10-km radius buffer.

| Variable                | Males      |           |          | Females    |           |          |
|-------------------------|------------|-----------|----------|------------|-----------|----------|
|                         | Rate ratio | 95%CI     | <i>P</i> | Rate ratio | 95%CI     | <i>P</i> |
| Smoking                 | 4.41       | 2.53-7.68 | < 0.001  | 10.3       | 5.47-19.4 | < 0.001  |
| Log(GNI)                | 0.92       | 0.84-1.02 | 0.11     | 0.83       | 0.73-0.94 | 0.004    |
| Log(PM <sub>2.5</sub> ) | 1.06       | 0.93-1.19 | 0.39     | 1.03       | 0.92-1.16 | 0.60     |

142 GNI, gross national income per capita; PM<sub>2.5</sub>, particulate matter <2.5µm aerodynamic diameter.

143

144

145
